# Supplementary material for: UKESM1.1: Development and evaluation of an updated configuration of the UK Earth System Model
Source: Copernicus journal article supplement (doi:10.5194/gmd-2022-113), 2022-09-07
Supplement: Supplementary file [file gmd-2022-113-AC3-supplement.pdf]

## Response to Review by RC2

Relevant figures to accompany this response:

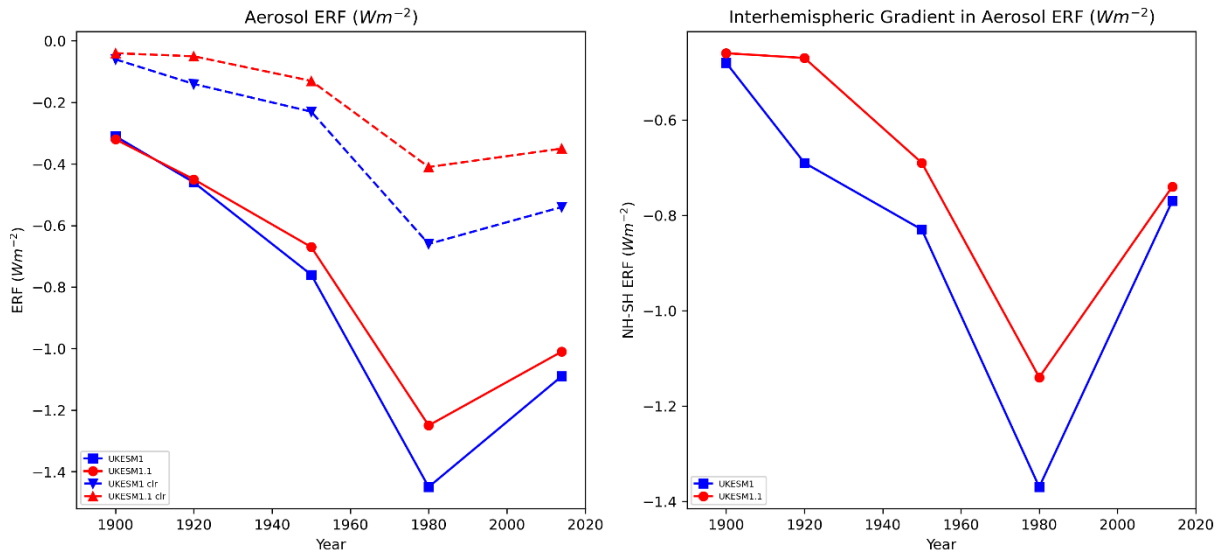

Figure: (left) Timeseries of the aerosol ERF from UKESM1 (blue) and UKESM1.1 (red) for all-sky (solid) and clear-sky (dashed) conditions. The aerosol ERFs are calculated for selected timeslices along the historical period; (right) the interhemispheric gradient in aerosol ERF for each timeslice.

### Comparison of using tas versus blended tas/sst dataset for figure 3:

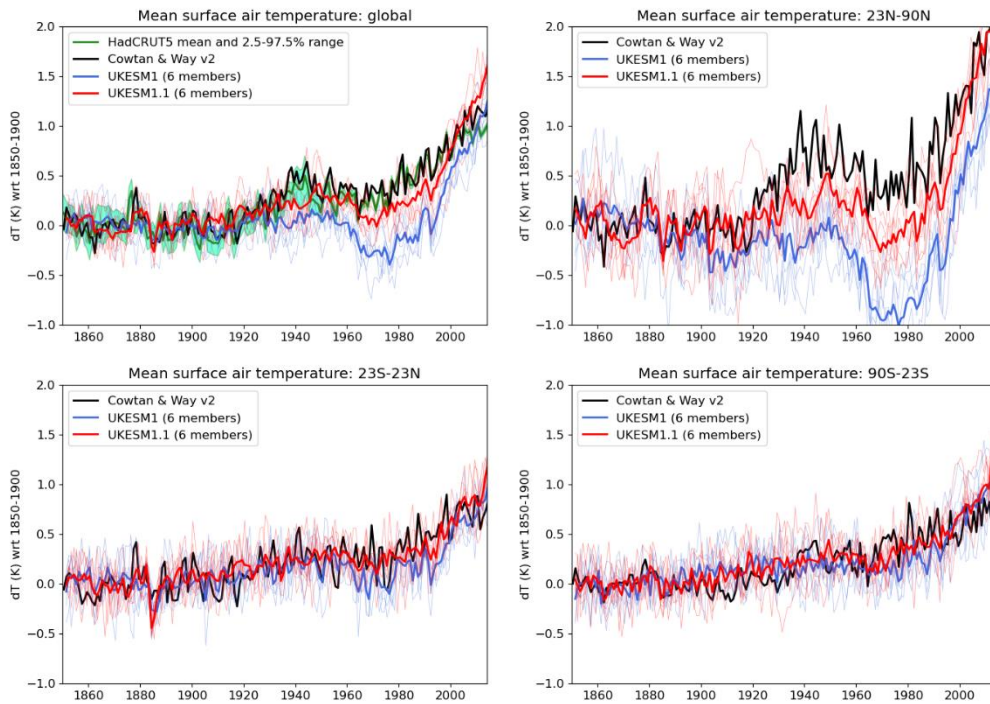

Figure (above): Surface air temperature anomalies using only 'tas'.

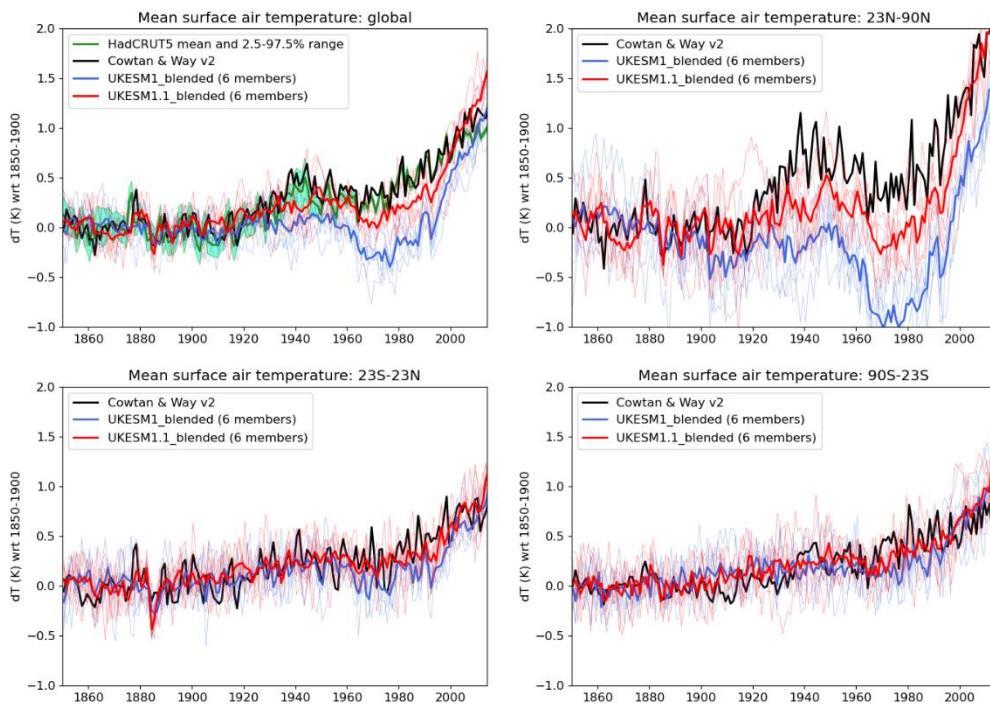

Figure (above): Surface air temperature anomalies using a blended 'tas' and SST dataset.
